# Supplementary material for: Electrochemical methods for on-site multidrug detection at festivals
Source: Royal Society of Chemistry journal article supplement (doi:10.1039/d2sd00043a), 2022-01-01
Supplement: d2sd00043a1.pdf [file d2sd00043a1.pdf]

## Supporting information

### Electrochemical methods for on-site multidrug detection at festivals

**Robin Van Echelpoel,<sup>a,b,‡</sup> Jonas Schram,<sup>a,b,‡</sup> Marc Parrilla,<sup>a,b</sup> Devin Daems,<sup>a,b</sup> Amorn Slosse,<sup>c</sup>  
Filip Van Durme,<sup>c</sup> Karolien De Wael<sup>\*,a,b</sup>**

<sup>a</sup> A-Sense Lab, Department of Bioscience engineering, University of Antwerp, Groenenborgerlaan 171, 2020 Antwerp, Belgium.

<sup>b</sup> NANOLab Center of Excellence, University of Antwerp, Groenenborgerlaan 171, 2020 Antwerp, Belgium.

<sup>c</sup> Drugs and Toxicology Department, National Institute for Criminalistics and Criminology (NICC), Vilvoordsesteenweg 100, 1120, Brussels, Belgium.

<sup>‡</sup> Shared first authors

**\*Corresponding author:** Karolien De Wael (karolien.dewael@uantwerpen.be)

## Table of contents

|                                                                                   |              |
|-----------------------------------------------------------------------------------|--------------|
| <b>Experimental section</b>                                                       | <b>SI-3</b>  |
| <i>Portable Raman measurements</i>                                                | SI-3         |
| <b>Tables</b>                                                                     | <b>SI-4</b>  |
| <i>Table S1. Training set</i>                                                     | SI-4         |
| <i>Table S2. Overview of adulterant peaks and potentials</i>                      | SI-4         |
| <i>Table S3. Overview of drug peak potentials in binary mixtures</i>              | SI-5         |
| <i>Table S4. Composition and appearance of confiscated samples</i>                | SI-6         |
| <i>Table S5. Electrochemical and Raman results of confiscated sample analysis</i> | SI-8         |
| <b>Figures</b>                                                                    | <b>SI-11</b> |
| <i>Figure S1. Chemical structures target drugs</i>                                | SI-11        |
| <i>Figure S2. Pre-processed SWVs of adulterants</i>                               | SI-11        |
| <i>Figure S3. Pre-processed SWVs of binary mixtures</i>                           | SI-12        |
| <i>Figure S4. Representation of the database used in dual sensor</i>              | SI-13        |
| <i>Figure S5. Pre-processed SWVs of confiscated samples</i>                       | SI-15        |

## Experimental section

**Portable Raman measurements.** A Bruker Bravo Handheld Raman spectrometer (Bruker Optik GmbH, Ettlingen, Germany) was used for all Raman measurements. The instrument uses a dual laser excitation feature with two laser diodes (wavelengths: 785 nm and 852 nm). Spectra were recorded from 170  $\text{cm}^{-1}$  to 3200  $\text{cm}^{-1}$ . OPUS 8.2.28 (Bruker Optik GmbH, Ettlingen, Germany) software was used for data acquisition and analysis. All seized samples were processed by the partnered institutes into powdered form and kept in transparent Eppendorf tubes. All measurements were performed by placing the Eppendorf tubes containing the sample on the measuring tip. The TICTAC Drug Library (TICTAC Communications Ltd., London, United Kingdom) was used for identification.

## Tables

**Table S1.** Training set containing four drugs, eight adulterants and 21 binary mixtures.

| Training set |               |          |               |
|--------------|---------------|----------|---------------|
| Cocaine      | + Benzocaine  | MDMA     | + Amphetamine |
|              | + Caffeine    |          | + Caffeine    |
|              | + Levamisole  |          | + Creatine    |
|              | + Lidocaine   |          | + Ketamine    |
|              | + Paracetamol |          | + Paracetamol |
|              | + Procaine    |          | + Phenacetin  |
|              | + Phenacetin  |          |               |
|              |               |          |               |
| Amphetamine  | + Caffeine    | Ketamine | + Amphetamine |
|              | + Creatine    |          | + Benzocaine  |
|              | + Paracetamol |          | + Caffeine    |
|              |               |          | + Creatine    |
|              |               |          | + Paracetamol |
|              |               |          |               |
| Codeine      | Procaine      | Caffeine | Paracetamol   |
| Lidocaine    | Benzocaine    | Creatine | Phenacetin    |

**Table S2.** Overview of the peaks produced by each adulterant and the corresponding peak potential in the pH7F and pH12 measuring conditions.

|             | pH7F        |                    | pH12        |                    |
|-------------|-------------|--------------------|-------------|--------------------|
|             | Peak number | Peak potential (V) | Peak number | Peak potential (V) |
| Benzocaine  | 1           | 0.76               | 1           | 0.53               |
|             | 2           | 0.93               |             |                    |
|             | 3           | 1.00               |             |                    |
|             | 4           | 1.14               |             |                    |
| Caffeine    | 1           | 1.33               | 1           | 1.28               |
| Codeine     | 1           | 0.91               | 1           | 0.77               |
|             | 2           | 1.04               | 2           | 0.91               |
|             | 3           | 1.27               | 3           | 1.10               |
| Creatine    | 1           | /                  | 1           | /                  |
| Lidocaine   | 1           | 0.82               | 1           | 0.66               |
|             | 2           | 0.99               |             |                    |
|             | 3           | 1.18               |             |                    |
| Paracetamol | 1           | 0.38               | 1           | 0.10               |
| Phenacetin  | 1           | 0.76               | 1           | 0.54               |
|             | 2           | 1.13               |             |                    |
| Procaine    | 1           | 0.80               | 1           | 0.69               |

|  |   |      |  |
|--|---|------|--|
|  | 2 | 1.08 |  |
|  | 3 | 1.26 |  |

**Table S3.** Overview of the potentials of drug peaks in their binary mixtures in pH7F and pH12. Between brackets is the potential change of the characteristic drug peaks compared to those of the pure compound. Deviations of 50 mV and more are indicated in red.

|                           | pH7F      |                    | pH12      |                    |
|---------------------------|-----------|--------------------|-----------|--------------------|
|                           | Peak name | Peak potential (V) | Peak name | Peak potential (V) |
| Amphetamine + caffeine    | A1        | 1.01 (+0.00)       |           |                    |
|                           | A2        | 1.33 (+0.10)       |           |                    |
| Amphetamine + creatine    | A1        | 1.01 (+0.00)       |           |                    |
|                           | A2        | 1.25 (+0.02)       |           |                    |
| Amphetamine + paracetamol | A1        | 1.02 (+0.01)       |           |                    |
|                           | A2        | 1.26 (+0.03)       |           |                    |

|                       |    |              |    |              |
|-----------------------|----|--------------|----|--------------|
| Cocaine + benzocaine  | C1 | 0.94 (-0.04) | C2 | 0.92 (+0.09) |
| Cocaine + caffeine    | C1 | 1.02 (+0.04) | C2 | 0.83 (+0.00) |
| Cocaine + levamisole  | C1 | 0.96 (-0.02) | C2 | 0.87 (+0.04) |
| Cocaine + lidocaine   | C1 | 1.04 (+0.06) | C2 | 0.85 (+0.02) |
| Cocaine + paracetamol | C1 | 1.03 (+0.05) | C2 | 0.82 (-0.01) |
| Cocaine + procaine    | C1 | 0.97 (-0.01) | C2 | 0.90 (+0.07) |
| Cocaine + phenacetin  | C1 | 1.02 (+0.04) | C2 | 0.83 (+0.04) |

|                        |    |              |    |              |
|------------------------|----|--------------|----|--------------|
| Ketamine + amphetamine | K1 | 1.04 (+0.05) | K2 | 1.01 (+0.03) |
|                        |    |              | K3 | 1.26 (+0.00) |
| Ketamine + benzocaine  | K1 | 1.01 (+0.02) | K2 | 1.07 (+0.09) |
|                        |    |              | K3 | /            |
| Ketamine + caffeine    | K1 | 1.03 (+0.04) | K2 | 0.94 (-0.04) |
|                        |    |              | K3 | 1.27 (+0.01) |
| Ketamine + creatine    | K1 | 1.03 (+0.04) | K2 | 0.96 (-0.02) |
|                        |    |              | K3 | 1.24 (-0.02) |
| Ketamine + paracetamol | K1 | 1.04 (+0.05) | K2 | 0.96 (-0.02) |
|                        |    |              | K3 | 1.23 (-0.03) |

|                    |    |              |    |              |
|--------------------|----|--------------|----|--------------|
| MDMA + amphetamine | M1 | 0.80 (-0.01) | M3 | /            |
|                    | M2 | 1.00 (-0.03) | M4 | 0.93 (-0.02) |
|                    |    |              | M5 | 1.28 (+0.04) |

|                    |    |              |    |              |
|--------------------|----|--------------|----|--------------|
| MDMA + caffeine    | M1 | 0.83 (+0.02) | M3 | 0.82 (+0.01) |
|                    | M2 | 1.02 (-0.01) | M4 | 0.93 (-0.02) |
|                    |    |              | M5 | 1.30 (+0.06) |
| MDMA + creatine    | M1 | 0.82 (+0.01) | M3 | 0.82 (+0.01) |
|                    | M2 | 1.01 (-0.02) | M4 | 0.93 (-0.02) |
|                    |    |              | M5 | 1.24 (+0.00) |
| MDMA + ketamine    | M1 | 0.79 (-0.02) | M3 | /            |
|                    | M2 | 0.98 (-0.05) | M4 | 0.92 (-0.03) |
|                    |    |              | M5 | 1.27 (+0.03) |
| MDMA + paracetamol | M1 | 0.84 (+0.03) | M3 | 0.82 (+0.01) |
|                    | M2 | 1.02 (-0.01) | M4 | 0.93 (-0.02) |
|                    |    |              | M5 | 1.24 (+0.00) |
| MDMA + phenacetin  | M1 | 0.79 (-0.02) | M3 | 0.82 (+0.01) |
|                    | M2 | 0.99 (-0.04) | M4 | 0.94 (-0.01) |
|                    |    |              | M5 | 1.25 (+0.01) |

**Table S4.** Overview of the composition and appearance of street samples. Identification and weight percentages were determined at NICC using GC-MS and GC-FID respectively.

| Name | Sample nature (+ color) | Composition                                                               | wt. %                            |
|------|-------------------------|---------------------------------------------------------------------------|----------------------------------|
| 1A   | Tablet (off-white)      | <b>Amphetamine</b>                                                        | 25.8                             |
| 2A   | Paste (orange)          | <b>Amphetamine</b><br>Caffeine                                            | 52.2<br>29.2                     |
| 3A   | Tablet (red)            | <b>Amphetamine</b><br>Caffeine<br>Ketamine<br>MDMA<br>3-Fluoroamphetamine | 6.6<br>13.3<br>/<br>1.36<br>1.84 |
| 4A   | Powder (yellow)         | <b>Amphetamine</b><br>Caffeine                                            | 20.9<br>48.4                     |
| 5A   | Powder (white)          | <b>Amphetamine</b><br>Caffeine                                            | 47.9<br>41.8                     |
| 6A   | Powder (white)          | <b>Amphetamine</b><br>Caffeine                                            | 57.6<br>31.2                     |
| 7A   | Paste (yellow)          | <b>Amphetamine</b><br>Caffeine                                            | 67.7<br>20.7                     |
| 8A   | Paste (yellow)          | <b>Amphetamine</b><br>Caffeine                                            | 36.4<br>1.3                      |
| 9A   | Powder (white)          | <b>Amphetamine</b><br>Caffeine                                            | 77.8<br>13.4                     |
| 10A  | Powder (yellow)         | <b>Amphetamine</b>                                                        | 62.1                             |

  

|    |                |                |      |
|----|----------------|----------------|------|
| 1C | Powder (white) | <b>Cocaine</b> | 97.5 |
| 2C | Powder (white) | <b>Cocaine</b> | 57.0 |

|     |                |                                                                                   |                                            |
|-----|----------------|-----------------------------------------------------------------------------------|--------------------------------------------|
|     |                | Levamisole                                                                        | 41.0                                       |
| 3C  | Powder (white) | <b>Cocaine</b><br>Paracetamol<br>Levamisole                                       | 19.2<br>73.2<br>1.6                        |
| 4C  | Powder (white) | <b>Cocaine</b><br>Phenacetin<br>Levamisole                                        | 31.0<br>2.8<br>5.7                         |
| 5C  | Powder (white) | <b>Cocaine</b><br>Boric acid                                                      | 29.6<br>/                                  |
| 6C  | Powder (white) | <b>Cocaine</b><br>Phenacetin<br>Caffeine<br>Lidocaine<br>Levamisole<br>Benzocaine | 22.0<br>8.3<br>15.5<br>12.0<br>2.2<br>25.7 |
| 7C  | Powder (white) | <b>Cocaine</b><br>Caffeine<br>Hydroxyzine<br>Lidocaine                            | 75.5<br>3.1<br>9.6<br><1                   |
| 8C  | Powder (brown) | <b>Cocaine</b>                                                                    | 20.0                                       |
| 9C  | Powder (white) | <b>Cocaine</b>                                                                    | >90.0                                      |
| 10C | Powder (white) | <b>Cocaine</b><br>Levamisole                                                      | 57.0<br>41.0                               |

|     |                    |                 |       |
|-----|--------------------|-----------------|-------|
| 1K  | Powder (off-white) | <b>Ketamine</b> | 83.0  |
| 2K  | Powder (off-white) | <b>Ketamine</b> | 5.0   |
| 3K  | Powder (white)     | <b>Ketamine</b> | 82.0  |
| 4K  | Crystals (white)   | <b>Ketamine</b> | 72.0  |
| 5K  | Powder (white)     | <b>Ketamine</b> | 100.0 |
| 6K  | Powder (white)     | <b>Ketamine</b> | 84.0  |
| 7K  | Powder (white)     | <b>Ketamine</b> | 99.0  |
| 8K  | Crystals (white)   | <b>Ketamine</b> | 99.0  |
| 9K  | Powder (white)     | <b>Ketamine</b> | 100.0 |
| 10K | Powder (white)     | <b>Ketamine</b> | 100.0 |

|    |                    |             |      |
|----|--------------------|-------------|------|
| 1M | Powder (white)     | <b>MDMA</b> | 93.7 |
| 2M | Powder (off-white) | <b>MDMA</b> | 92.6 |
| 3M | Crystals (white)   | <b>MDMA</b> | 88.0 |
| 4M | Tablet (pink)      | <b>MDMA</b> | 40.4 |
| 5M | Tablet (grey)      | <b>MDMA</b> | 24.7 |
| 6M | Tablet (purple)    | <b>MDMA</b> | 57.2 |
| 7M | Tablet (grey)      | <b>MDMA</b> | 54.1 |
| 8M | Crystals (white)   | <b>MDMA</b> | 96.8 |

|     |                 |             |      |
|-----|-----------------|-------------|------|
| 9M  | Tablet (orange) | <b>MDMA</b> | 39.5 |
| 10M | Tablet (yellow) | <b>MDMA</b> | 54.4 |

**Table S5.** Potentials of the peaks detected in the voltammograms of the confiscated samples in pH7F and pH12, as well as the results of the peak recognition software and the portable Raman analysis. For the flowchart, the result after the first analysis (pH7F) and, if applicable, second analysis (pH12) are displayed. For the dual-sensor, the result of the double analysis (pH7F + pH12 in parallel) is shown. For the Raman results, the three main components resulting from the library search were considered. The result displayed in the table is the most relevant one according to the analysis by the standard method (**Table S4**). Incorrect results are indicated in red. ACK: joint interval amphetamine, cocaine and ketamine; AMP: amphetamine; COC: cocaine; COC(b): cocaine after activation of extended interval due to benzocaine detection (0.45 – 0.55 V in pH12); KET: ketamine.

|      | pH7F               | pH12               | Flowchart result |                 | Dual-sensor result | Raman result    |
|------|--------------------|--------------------|------------------|-----------------|--------------------|-----------------|
| Name | Peak potential (V) | Peak potential (V) | First analysis   | Second analysis | Double analysis    |                 |
| 1A   | 0.97               | 1.34               | ACK              | AMP             | AMP                | Nor-ephedrine   |
|      | 1.17               |                    |                  |                 |                    |                 |
| 2A   | 0.99               | 1.34               | ACK              | AMP             | AMP                | Phenethyl-amine |
|      | 1.18               |                    |                  |                 |                    |                 |
|      | 1.34               |                    |                  |                 |                    |                 |
| 3A   | 0.97               | 1.34               | ACK              | AMP             | AMP                | Caffeine        |
|      | 1.30               |                    |                  |                 |                    |                 |
| 4A   | 0.96               | 1.34               | ACK              | AMP             | AMP                | AMP             |
|      | 1.33               |                    |                  |                 |                    |                 |
| 5A   | 0.97               | 1.35               | ACK              | AMP             | AMP                | AMP             |
|      | 1.17               |                    |                  |                 |                    |                 |
|      | 1.34               |                    |                  |                 |                    |                 |
| 6A   | 0.99               | 1.34               | ACK              | AMP             | AMP                | AMP             |
|      | 1.18               |                    |                  |                 |                    |                 |
|      | 1.34               |                    |                  |                 |                    |                 |
| 7A   | 0.98               | 1.33               | ACK              | AMP             | AMP                | Nor-ephedrine   |
|      | 1.18               |                    |                  |                 |                    |                 |
|      | 1.35               |                    |                  |                 |                    |                 |
| 8A   | 0.96               | 1.34               | ACK              | AMP             | AMP                | Creatine        |
|      | 1.17               |                    |                  |                 |                    |                 |
| 9A   | 0.98               | 1.34               | ACK              | AMP             | AMP                | Nor-ephedrine   |
|      | 1.18               |                    |                  |                 |                    |                 |
|      | 1.33               |                    |                  |                 |                    |                 |
|      | 0.98               | 1.34               |                  |                 |                    | Nor-            |

|     |      |  |     |     |     |           |
|-----|------|--|-----|-----|-----|-----------|
| 10A | 1.18 |  | ACK | AMP | AMP | ephedrine |
|     | 1.32 |  |     |     |     |           |

|     |      |      |         |     |         |             |
|-----|------|------|---------|-----|---------|-------------|
| 1C  | 1.09 | 0.83 | No drug | /   | No drug | COC         |
|     | 1.30 | 1.10 |         |     |         |             |
|     |      | 1.34 |         |     |         |             |
| 2C  | 1.05 | 0.84 | ACK     | COC | COC     | Paracetamol |
|     | 1.26 | 1.07 |         |     |         |             |
|     |      | 1.41 |         |     |         |             |
| 3C  | 0.39 | 0.15 | ACK     | COC | COC     | COC         |
|     | 1.02 | 0.85 |         |     |         |             |
|     | 1.19 |      |         |     |         |             |
| 4C  | 0.78 | 0.51 | ACK     | COC | COC(b)  | Unknown     |
|     | 1.01 | 0.81 |         |     |         |             |
|     | 1.21 | 1.38 |         |     |         |             |
| 5C  | 1.04 | 0.83 | ACK     | COC | COC     | COC         |
|     |      | 1.33 |         |     |         |             |
| 6C  | 0.75 | 0.54 | ACK     | COC | COC(b)  | Unknown     |
|     | 1.02 | 0.92 |         |     |         |             |
|     | 1.33 |      |         |     |         |             |
| 7C  | 0.76 | 0.69 | ACK     | COC | COC     | Unknown     |
|     | 0.98 | 0.84 |         |     |         |             |
|     | 1.30 | 1.31 |         |     |         |             |
| 8C  | 1.03 | 0.83 | ACK     | COC | COC     | COC         |
|     | 1.22 | 1.37 |         |     |         |             |
| 9C  | 1.09 | 0.83 | No drug | /   | No drug | COC         |
|     | 1.34 | 1.12 |         |     |         |             |
|     |      | 1.35 |         |     |         |             |
| 10C | 1.05 | 0.86 | ACK     | COC | COC     | COC         |
|     | 1.26 | 1.08 |         |     |         |             |
|     |      | 1.29 |         |     |         |             |

|    |      |      |      |     |     |     |
|----|------|------|------|-----|-----|-----|
| 1K | 0.83 | 1.01 | MDMA | /   | KET | KET |
|    | 1.01 | 1.38 |      |     |     |     |
|    | 1.28 |      |      |     |     |     |
| 2K | 1.06 | 1.00 | ACK  | KET | KET | KET |
|    | 1.31 | 1.35 |      |     |     |     |
| 3K | 0.84 | 1.00 | MDMA | /   | KET | KET |
|    | 1.03 |      |      |     |     |     |
|    | 1.29 | 1.37 |      |     |     |     |
| 4K | 0.83 | 0.99 | MDMA | /   | KET | COC |
|    | 1.05 |      |      |     |     |     |
|    | 1.28 | 1.35 |      |     |     |     |
| 5K | 0.83 | 1.00 | MDMA | /   | KET | KET |
|    | 0.99 | 1.36 |      |     |     |     |
|    | 1.36 |      |      |     |     |     |
| 6K | 0.83 | 1.01 | ACK  | KET | AMP | KET |
|    | 0.96 | 1.38 |      |     |     |     |

|     |      |      |      |     |     |     |
|-----|------|------|------|-----|-----|-----|
|     | 1.30 |      |      |     |     |     |
| 7K  | 0.83 | 1.01 | MDMA | /   | KET | KET |
|     | 0.99 | 1.37 |      |     |     |     |
|     | 1.34 |      |      |     |     |     |
| 8K  | 0.83 | 1.00 | MDMA | /   | KET | COC |
|     | 0.99 | 1.38 |      |     |     |     |
|     | 1.37 |      |      |     |     |     |
| 9K  | 0.83 | 1.00 | ACK  | KET | KET | KET |
|     | 0.98 | 1.36 |      |     |     |     |
|     | 1.32 |      |      |     |     |     |
| 10K | 0.83 | 1.00 | ACK  | KET | KET | KET |
|     | 0.97 | 1.36 |      |     |     |     |
|     | 1.35 |      |      |     |     |     |

|     |      |      |      |   |      |                 |
|-----|------|------|------|---|------|-----------------|
| 1M  | 0.85 | 0.93 | MDMA | / | MDMA | MDMA            |
|     | 1.05 | 1.30 |      |   |      |                 |
| 2M  | 0.85 | 0.93 | MDMA | / | MDMA | 2-amino propane |
|     | 1.03 | 1.29 |      |   |      |                 |
| 3M  | 0.85 | 0.93 | MDMA | / | MDMA | MDMA            |
|     | 1.04 | 1.30 |      |   |      |                 |
| 4M  | 0.84 | 0.93 | MDMA | / | MDMA | MDMA            |
|     | 1.03 | 1.25 |      |   |      |                 |
|     |      | 1.41 |      |   |      |                 |
| 5M  | 0.84 | 0.92 | MDMA | / | KET  | 2-amino propane |
|     | 1.03 | 1.38 |      |   |      |                 |
| 6M  | 0.84 | 0.94 | MDMA | / | MDMA | MDMA            |
|     | 1.03 | 1.26 |      |   |      |                 |
|     | 1.30 |      |      |   |      |                 |
| 7M  | 0.84 | 0.83 | MDMA | / | MDMA | 2-amino propane |
|     | 1.03 | 0.95 |      |   |      |                 |
|     | 1.31 | 1.25 |      |   |      |                 |
| 8M  | 0.85 | 0.91 | MDMA | / | KET  | MDMA            |
|     | 1.05 | 1.30 |      |   |      |                 |
| 9M  | 0.84 | 0.93 | MDMA | / | MDMA | MDMA            |
|     | 1.03 | 1.24 |      |   |      |                 |
|     |      | 1.40 |      |   |      |                 |
| 10M | 0.84 | 0.95 | MDMA | / | MDMA | MDMA            |

|                              |               |               |               |
|------------------------------|---------------|---------------|---------------|
| Accuracy confiscated samples | 32/40 (80.0%) | 35/40 (87.5%) | 24/40 (60.0%) |
|------------------------------|---------------|---------------|---------------|

## Figures

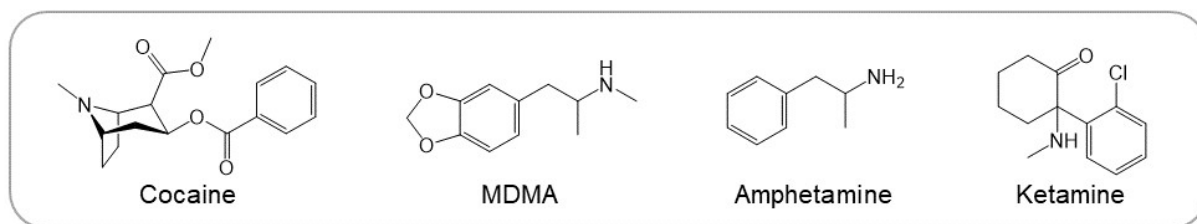

**Figure S1.** Chemical structures of the four target drugs.

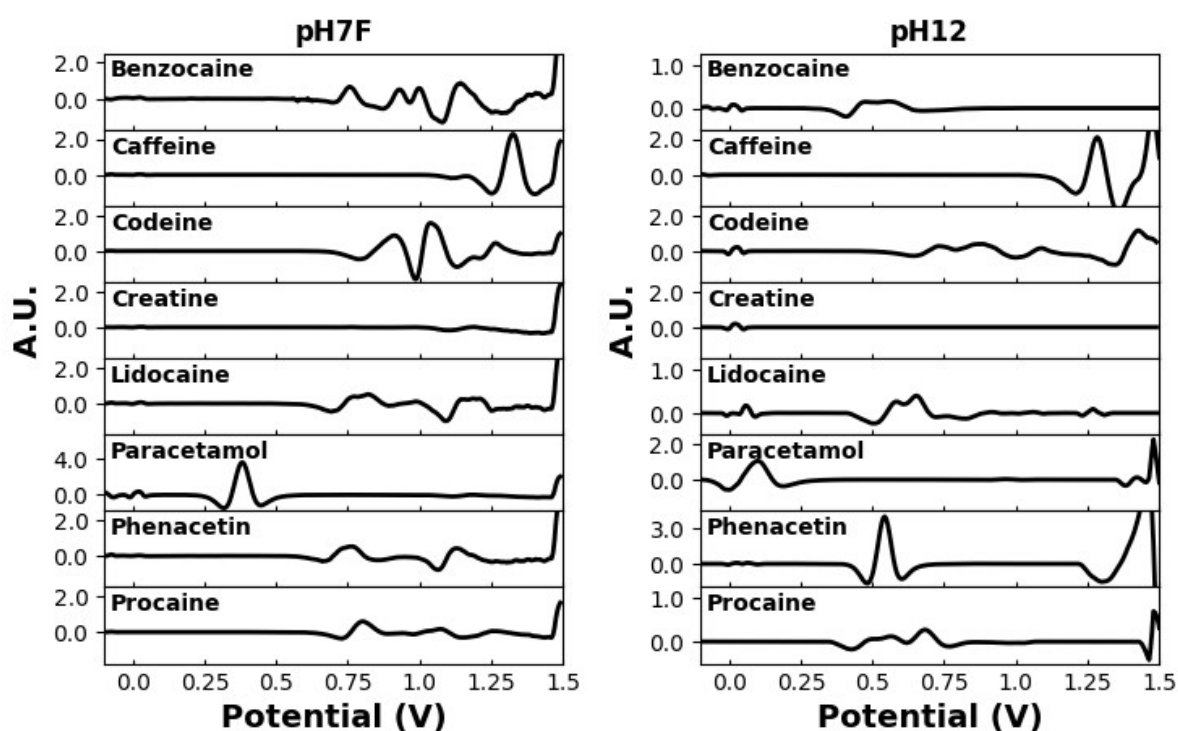

**Figure S2.** Overview of the pre-processed EPs of the adulterants in the training set, recorded in pH7F (left) and pH12 (right). Concentrations in pH7F: 1 mM. Concentrations in pH12: 0.5 mM.

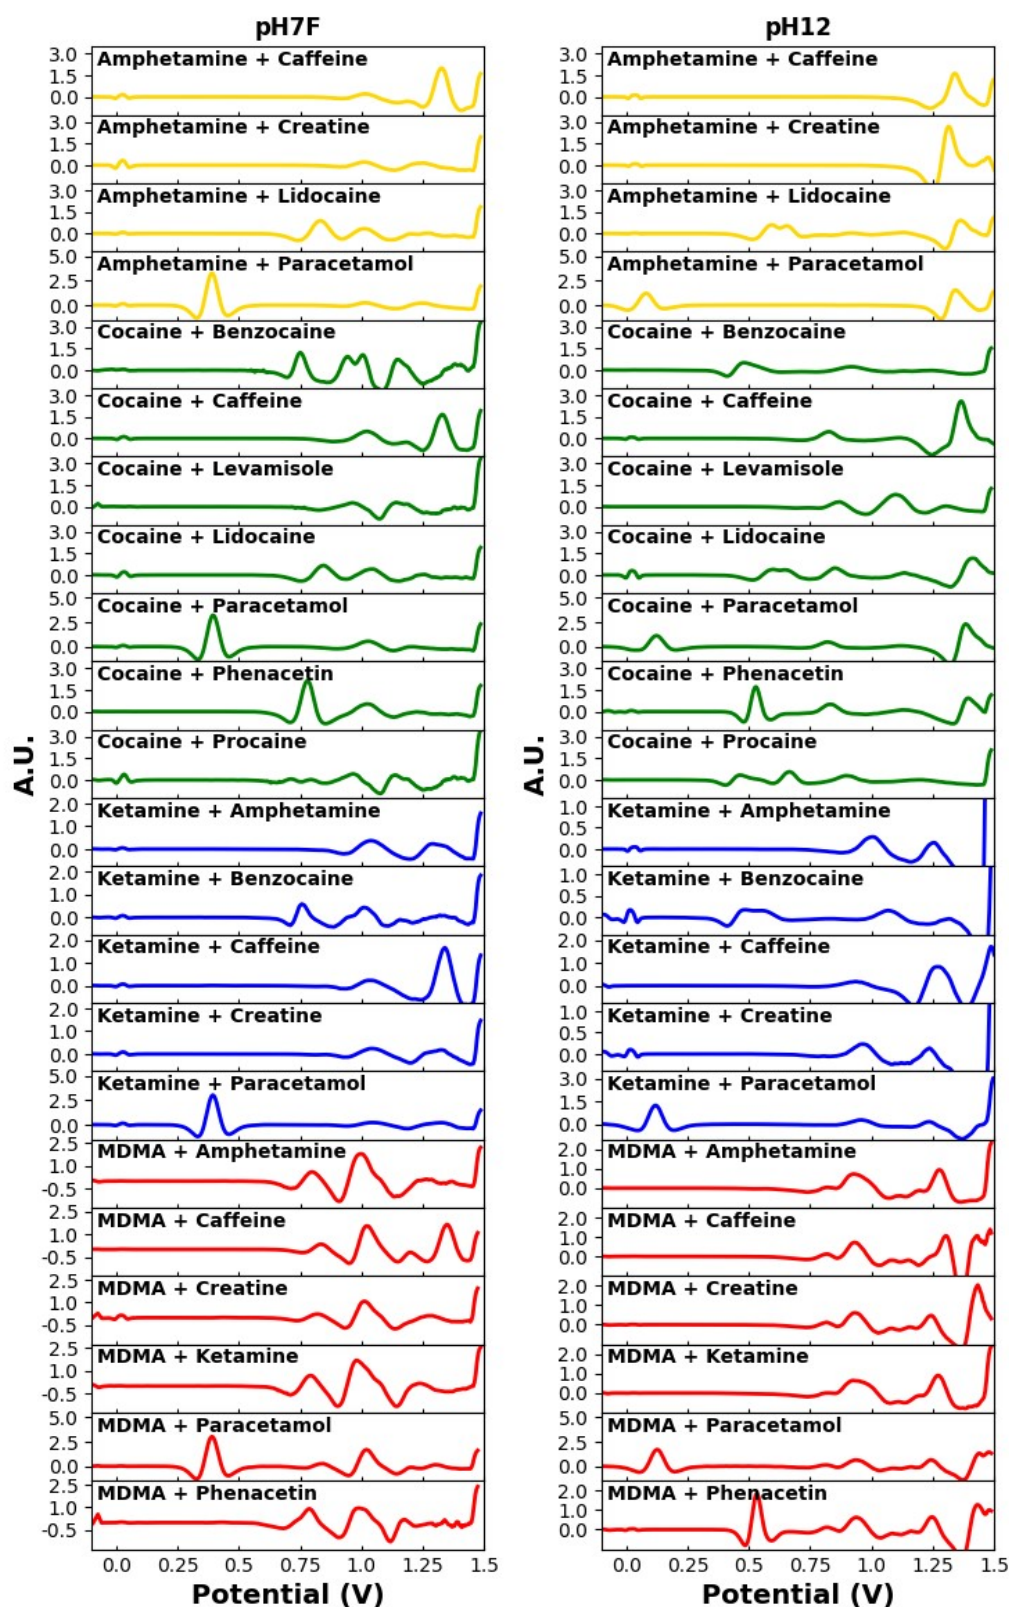

**Figure S3.** Overview of the pre-processed EPs of the binary mixtures in the training set, recorded in pH7F (left) and pH12 (right). Yellow: amphetamine mixtures, green: cocaine mixtures, blue: ketamine

mixtures, red: MDMA mixtures. Ratio in all mixtures: 1:1. Concentrations in pH7F: 1 mM. Concentrations in pH12: 0.5 mM.

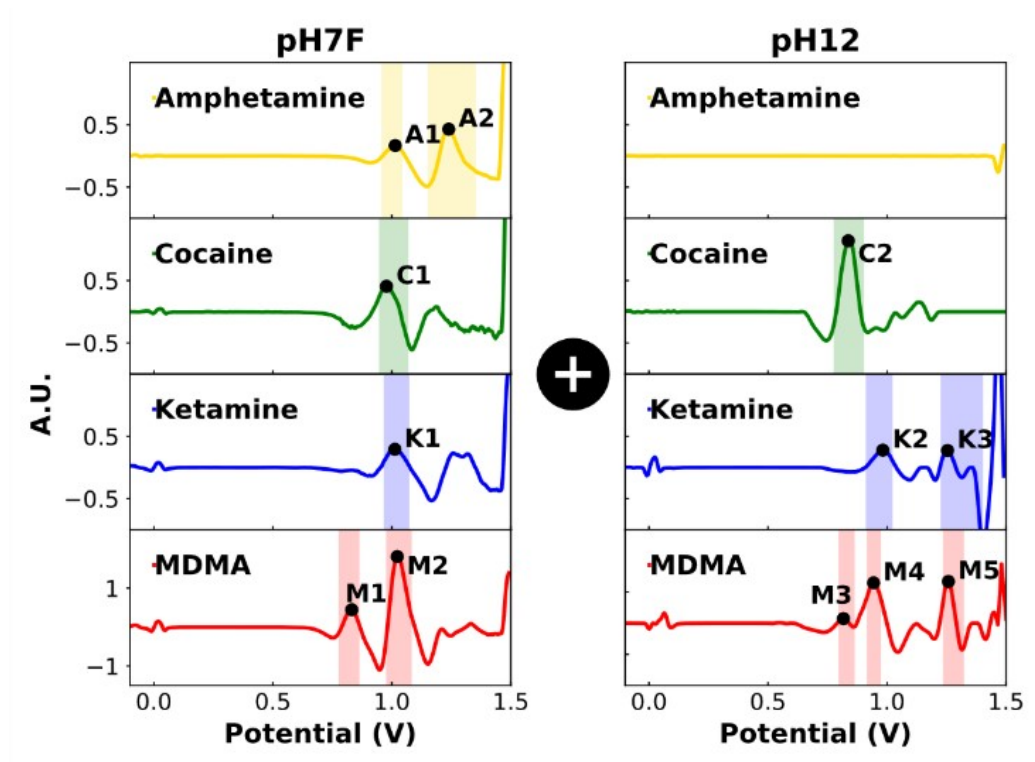

**Figure S4.** Representation of the database used in the dual-sensor method (pH7F + pH12).

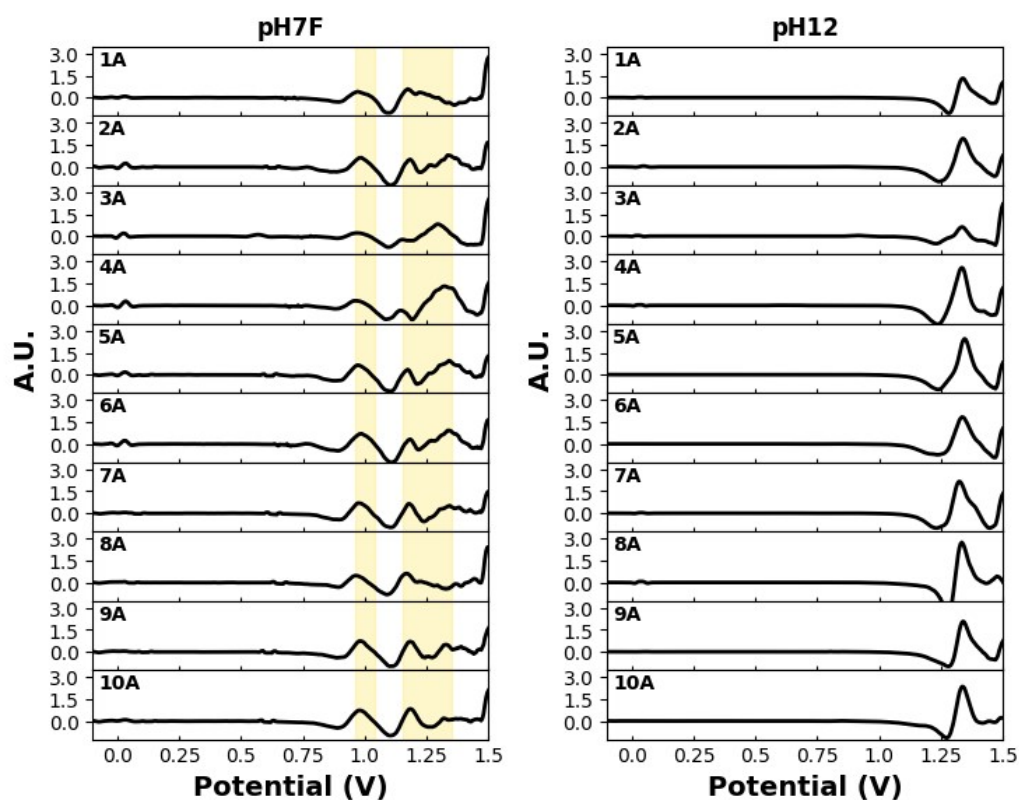

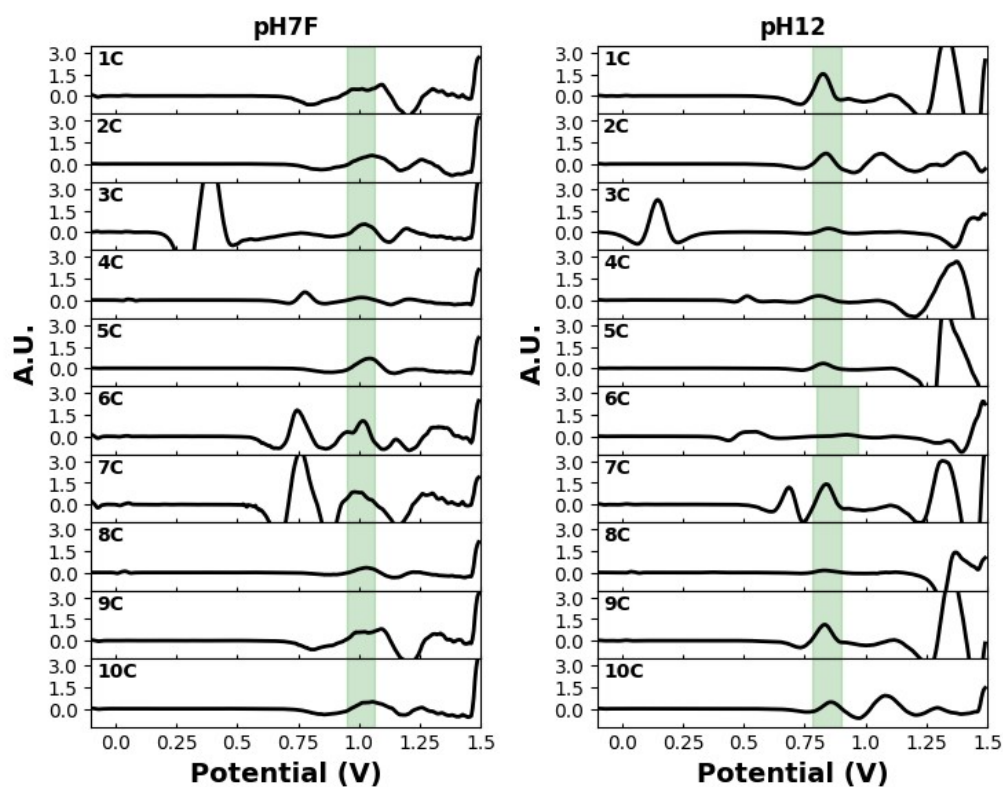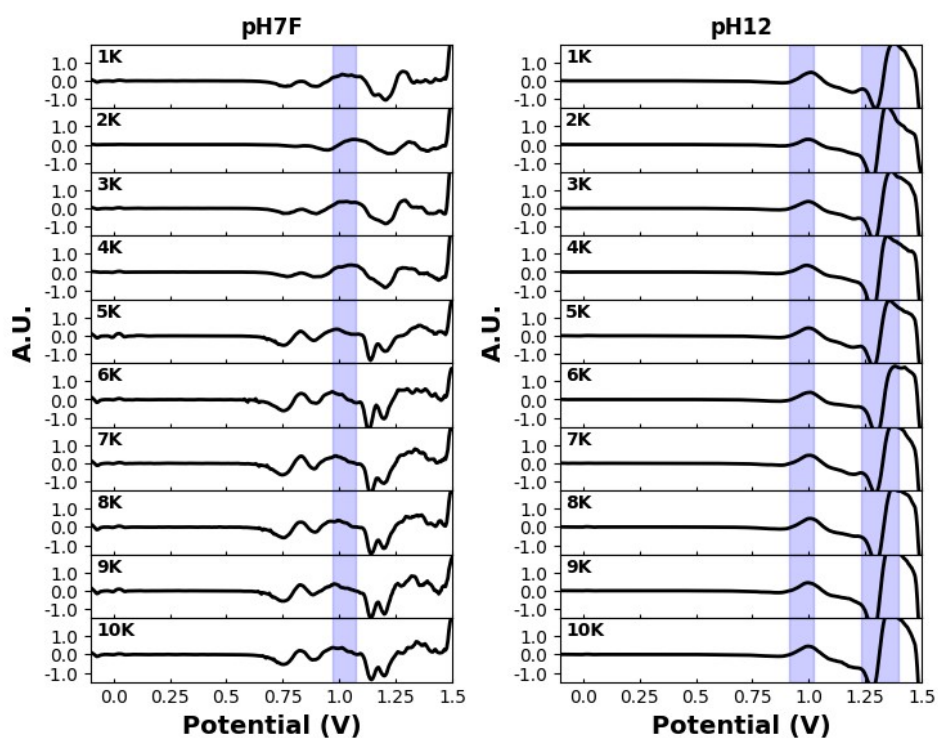

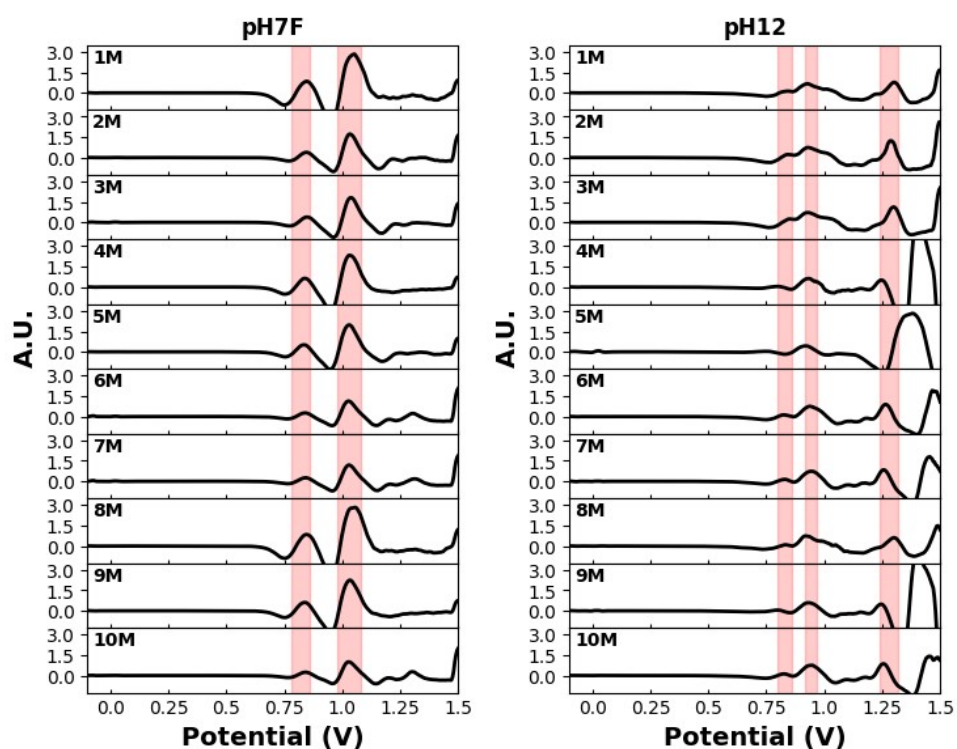

**Figure S5.** Overview of the pre-processed EPs of the confiscated samples, recorded in pH7F (left) and pH12 (right). The potential intervals defined for each drug's peaks are visually shown in the color assigned to each drug. Yellow: amphetamine samples, green: cocaine samples, blue: ketamine samples, red: MDMA samples. Concentrations in pH7F: 2.0 mg mL<sup>-1</sup>. Concentrations in pH12: 0.3 mg mL<sup>-1</sup>.
